# Supplementary material
Source: HighWire-hosted journal article supplement (https://jech.bmj.com/content/jech-2020-215927)

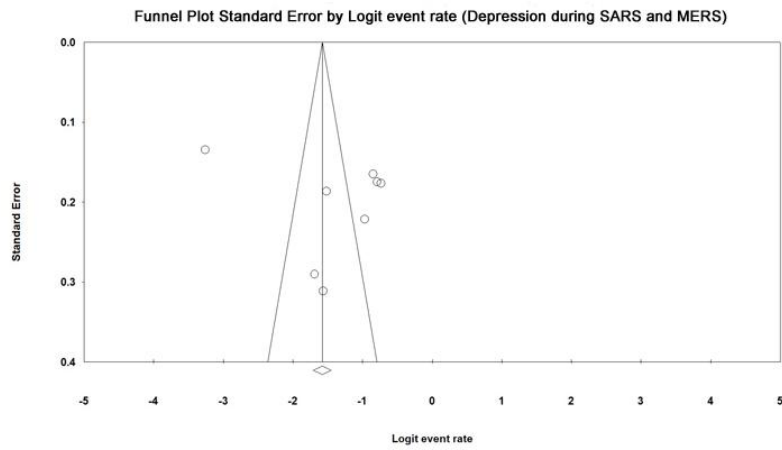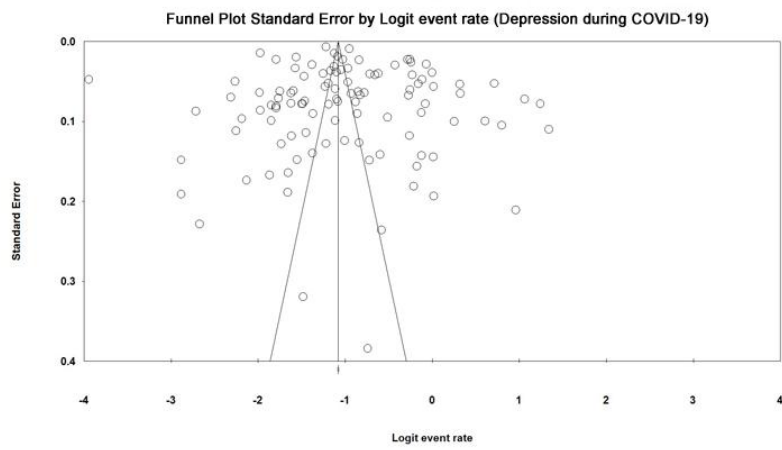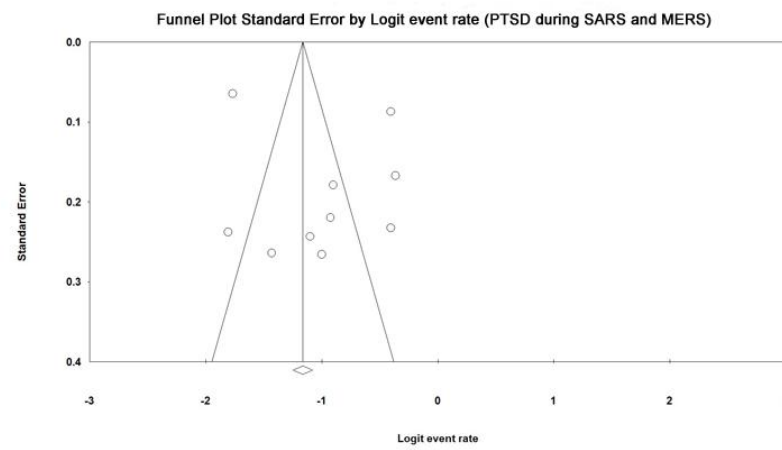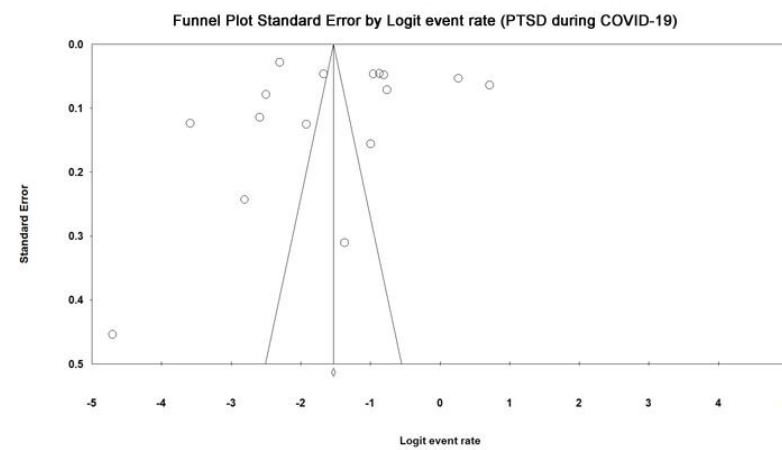

Supplement: inline-supplementary-material-4 [file inline-supplementary-material-4.pdf]

# Depression (patients) during COVID-19

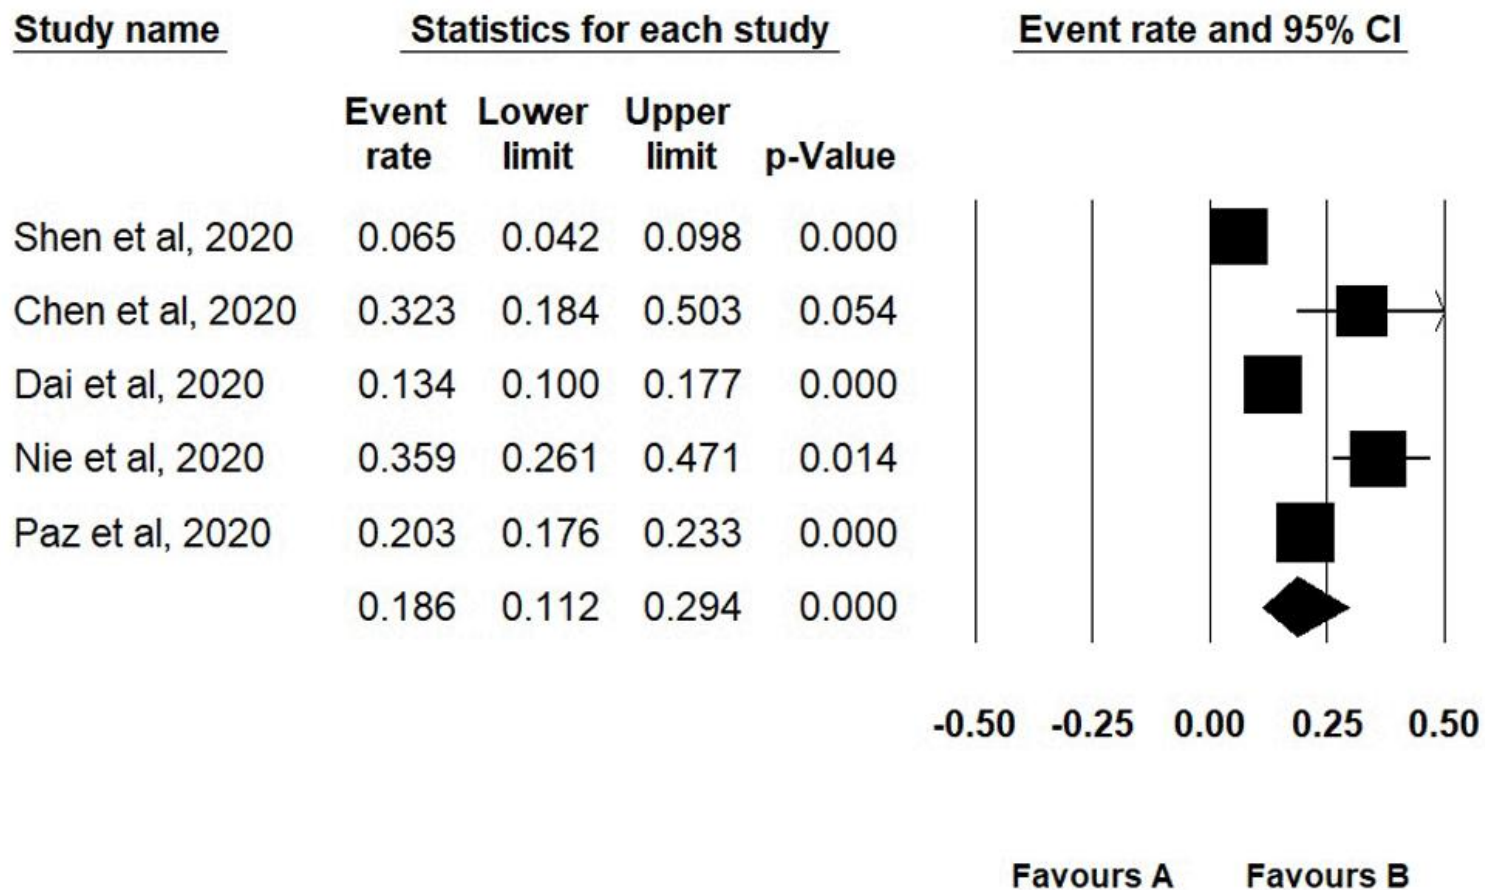

Supplement: inline-supplementary-material-6 [file inline-supplementary-material-6.pdf]
